# Supplementary material for: Nanoparticle-induced ion-sensitive reduction in decane–water interfacial tension
Source: Royal Society of Chemistry journal article supplement (doi:10.1039/c8cp04041a), 2018-01-01
Supplement: c8cp04041a1.pdf [file c8cp04041a1.pdf]

*Supplementary Information*

**Nanoparticle-induced ion-sensitive reduction in  
decane-water interfacial tension**

Boyao Wen, Chengzhen Sun, Bofeng Bai\*

State Key Laboratory of Multiphase Flow in Power Engineering, Xi'an Jiaotong University, Xi'an,  
Shaanxi, 710049, China.

\* Corresponding Author. Tel: +86-029-82665316; Electronic mail: [bfbai@mail.xjtu.edu.cn](mailto:bfbai@mail.xjtu.edu.cn)

## Contents

|                                                |    |
|------------------------------------------------|----|
| 1. Model and methods .....                     | 1  |
| 1.1 Interaction potentials .....               | 1  |
| 1.1.1 OPLS All-Atom force field.....           | 1  |
| 1.1.2 TIP3P water model.....                   | 5  |
| 1.2 Simulation details .....                   | 5  |
| 1.3 Model validation .....                     | 8  |
| 2. Interfacial structure .....                 | 9  |
| 2.1 Interfacial thickness .....                | 9  |
| 2.2 Density distribution of ions.....          | 10 |
| 3. Dynamics of nanoparticles.....              | 11 |
| 3.1 Calculation of diffusion coefficient ..... | 11 |
| References .....                               | 12 |

# 1. Model and methods

## 1.1 Interaction potentials

### 1.1.1 OPLS All-Atom force field

In our work, we employ the OPLS All-Atom (OPLS-AA) force field <sup>1</sup> to describe the interactions between decane molecules, which can accurately regenerate the thermodynamic properties of organic liquids. This force field includes non-bonded interactions, bond stretching, angle bending and torsion interactions:

$$E = E_{ab} + E_{bond} + E_{angle} + E(\phi) \quad (\text{S1})$$

The non-bonded interaction contains the standard Lennard-Jones and Coulombic pairwise interactions, given by

$$E_{ab} = 4\varepsilon \left[ \left( \frac{\sigma}{r_{ab}} \right)^{12} - \left( \frac{\sigma}{r_{ab}} \right)^6 \right] + \frac{Cq_aq_b}{\chi r_{ab}} \quad (r_{ab} < r_{cut}) \quad (\text{S2})$$

where  $\varepsilon$  is the potential well depth,  $\sigma$  the distance at which the potential is zero,  $r_{cut}$  the cut-off radius,  $C$  an energy-conversion constant,  $q_a$  and  $q_b$  the charges of atom  $a$  and  $b$ , and  $\chi$  is the dielectric constant. While  $r_{ab}$  is greater than  $r_{cut}$ , the long-range electrostatic interactions are described by Particle-Particle Particle-Mesh (PPPM) method. Potential parameters between the crossing atoms are obtained based on the Lorentz-Berthelot mixing rule,

$$\sigma_{ij} = \frac{\sigma_{ii} + \sigma_{jj}}{2} \quad \varepsilon_{ij} = \sqrt{\varepsilon_{ii}\varepsilon_{jj}} \quad (\text{S3})$$

All the LJ potential parameters are listed in **Table S1**.

**Table S1.** LJ potential parameters used in the simulations.

| Type                                    | $\varepsilon$ (eV)     | $\sigma$ (Å) |
|-----------------------------------------|------------------------|--------------|
| O-O                                     | $6.591 \times 10^{-3}$ | 3.1507       |
| H(H <sub>2</sub> O)-H(H <sub>2</sub> O) | $1.995 \times 10^{-3}$ | 0.4000       |
| C-C                                     | $2.862 \times 10^{-3}$ | 3.5000       |
| H(Decane)-H(Decane)                     | $1.301 \times 10^{-3}$ | 2.5000       |
| Si-Si                                   | $4.033 \times 10^{-3}$ | 4.1500       |

|                                           |                         |        |
|-------------------------------------------|-------------------------|--------|
| O(SiO <sub>2</sub> )-O(SiO <sub>2</sub> ) | $2.342 \times 10^{-3}$  | 3.4700 |
| H(SiO <sub>2</sub> )-H(SiO <sub>2</sub> ) | $1.301 \times 10^{-3}$  | 2.5000 |
| Na-Na                                     | $5.640 \times 10^{-3}$  | 2.3500 |
| Ca-Ca                                     | $19.501 \times 10^{-3}$ | 2.3609 |
| Mg-Mg                                     | $37.944 \times 10^{-3}$ | 1.3976 |
| Cl-Cl                                     | $4.341 \times 10^{-3}$  | 4.4015 |
| O-H(H <sub>2</sub> O)                     | $3.364 \times 10^{-3}$  | 1.7753 |
| O-C                                       | $4.351 \times 10^{-3}$  | 3.3254 |
| O-H(Decane)                               | $2.934 \times 10^{-3}$  | 2.8254 |
| O-Si                                      | $5.156 \times 10^{-3}$  | 3.6504 |
| O-O(SiO <sub>2</sub> )                    | $5.905 \times 10^{-3}$  | 3.3104 |
| O-H(SiO <sub>2</sub> )                    | $2.928 \times 10^{-3}$  | 2.8254 |
| O-Na                                      | $6.097 \times 10^{-3}$  | 2.7504 |
| O-Ca                                      | $11.337 \times 10^{-3}$ | 2.7558 |
| O-Mg                                      | $15.814 \times 10^{-3}$ | 2.2742 |
| O-Cl                                      | $5.349 \times 10^{-3}$  | 3.7761 |
| H(H <sub>2</sub> O)-C                     | $2.393 \times 10^{-3}$  | 1.9500 |
| H(H <sub>2</sub> O)-H(Decane)             | $1.613 \times 10^{-3}$  | 1.4500 |
| H(H <sub>2</sub> O)-Si                    | $2.836 \times 10^{-3}$  | 2.2750 |
| H(H <sub>2</sub> O)-O(SiO <sub>2</sub> )  | $3.249 \times 10^{-3}$  | 1.9350 |
| H(H <sub>2</sub> O)-H(SiO <sub>2</sub> )  | $1.611 \times 10^{-3}$  | 1.4500 |
| H(H <sub>2</sub> O)-Na                    | $3.354 \times 10^{-3}$  | 1.3750 |
| H(H <sub>2</sub> O)-Ca                    | $6.237 \times 10^{-3}$  | 1.3805 |
| H(H <sub>2</sub> O)-Mg                    | $8.700 \times 10^{-3}$  | 0.8988 |
| H(H <sub>2</sub> O)-Cl                    | $2.943 \times 10^{-3}$  | 2.4008 |
| C-H(Decane)                               | $1.931 \times 10^{-3}$  | 3.0000 |
| C-Si                                      | $3.397 \times 10^{-3}$  | 3.8250 |
| C-O(SiO <sub>2</sub> )                    | $3.891 \times 10^{-3}$  | 3.4850 |
| C-H(SiO <sub>2</sub> )                    | $1.930 \times 10^{-3}$  | 3.0000 |
| C-Na                                      | $4.018 \times 10^{-3}$  | 2.9250 |
| C-Ca                                      | $7.471 \times 10^{-3}$  | 2.9305 |

---

|                                           |                         |        |
|-------------------------------------------|-------------------------|--------|
| C-Mg                                      | $10.421 \times 10^{-3}$ | 2.4488 |
| C-Cl                                      | $3.525 \times 10^{-3}$  | 3.9508 |
| H(Decane)-Si                              | $2.290 \times 10^{-3}$  | 3.3250 |
| H(Decane)-O(SiO <sub>2</sub> )            | $2.623 \times 10^{-3}$  | 2.9850 |
| H(Decane)-H(SiO <sub>2</sub> )            | $1.301 \times 10^{-3}$  | 2.5000 |
| H(Decane)-Na                              | $2.709 \times 10^{-3}$  | 2.4250 |
| H(Decane)-Ca                              | $5.037 \times 10^{-3}$  | 2.4305 |
| H(Decane)-Mg                              | $7.026 \times 10^{-3}$  | 1.9488 |
| H(Decane)-Cl                              | $2.376 \times 10^{-3}$  | 3.4508 |
| Si-O(SiO <sub>2</sub> )                   | $4.619 \times 10^{-3}$  | 3.8100 |
| Si-H(SiO <sub>2</sub> )                   | $2.291 \times 10^{-3}$  | 3.3250 |
| Si-Na                                     | $4.769 \times 10^{-3}$  | 3.2500 |
| Si-Ca                                     | $8.868 \times 10^{-3}$  | 3.2555 |
| Si-Mg                                     | $12.370 \times 10^{-3}$ | 2.7738 |
| Si-Cl                                     | $4.184 \times 10^{-3}$  | 4.2758 |
| O(SiO <sub>2</sub> )-H(SiO <sub>2</sub> ) | $1.746 \times 10^{-3}$  | 2.9850 |
| O(SiO <sub>2</sub> )-Na                   | $3.634 \times 10^{-3}$  | 2.9100 |
| O(SiO <sub>2</sub> )-Ca                   | $6.758 \times 10^{-3}$  | 2.9155 |
| O(SiO <sub>2</sub> )-Mg                   | $9.427 \times 10^{-3}$  | 2.4338 |
| O(SiO <sub>2</sub> )-Cl                   | $3.189 \times 10^{-3}$  | 3.9358 |
| H(SiO <sub>2</sub> )-Na                   | $2.709 \times 10^{-3}$  | 2.4250 |
| H(SiO <sub>2</sub> )-Ca                   | $5.037 \times 10^{-3}$  | 2.4305 |
| H(SiO <sub>2</sub> )-Mg                   | $7.026 \times 10^{-3}$  | 1.9488 |
| H(SiO <sub>2</sub> )-Cl                   | $2.376 \times 10^{-3}$  | 3.4508 |
| Na-Cl                                     | $4.948 \times 10^{-3}$  | 3.3758 |
| Ca-Cl                                     | $9.201 \times 10^{-3}$  | 3.3811 |
| Mg-Cl                                     | $12.834 \times 10^{-3}$ | 2.8996 |

The bond stretching and angle bending in the molecules and silica nanoparticles are described by the *harmonic* potential as follows,

$$E_{bond} = K_{bond} (r_{ab} - r_0)^2 \quad (\text{S4})$$

$$E_{angle} = K_{angle} (\theta - \theta_0)^2 \quad (\text{S5})$$

where  $K_{bond}$  and  $K_{angle}$  are the bond and angle coefficients concerning with energy,  $r_0$  is the equilibrium bond distance, and  $\theta_0$  is the equilibrium bond angle. All bond and angle potential coefficients are shown in

**Table S2.**

**Table S2.** Bond stretching and angle bending parameters.

| Type                    | $r_0$ (Å) or $\theta_0$ (°) | $K_{bond}$ or $K_{angle}$ (eV) |
|-------------------------|-----------------------------|--------------------------------|
| O-H (water)             | 0.9572                      | 19.514                         |
| C-H                     | 1.0900                      | 14.744                         |
| C-C                     | 1.5290                      | 11.622                         |
| O-Si                    | 1.6800                      | 12.358                         |
| O-H (SiO <sub>2</sub> ) | 0.9450                      | 21.463                         |
| H-Si                    | 1.3820                      | 8.027                          |
| H-O-H                   | 104.52                      | 2.385                          |
| H-C-H                   | 107.80                      | 1.431                          |
| C-C-H                   | 110.70                      | 1.626                          |
| C-C-C                   | 109.50                      | 2.530                          |
| O-Si-O (inside)         | 109.47                      | 3.349                          |
| O-Si-O (surface)        | 113.10                      | 1.834                          |
| Si-O-Si                 | 149.80                      | 1.349                          |
| Si-O-H                  | 115.00                      | 2.168                          |
| O-Si-H                  | 113.40                      | 1.444                          |
| H-Si-H                  | 112.00                      | 1.379                          |

The last term of the OPLS-AA potential is the torsion interaction, which are described by the *opls* dihedral style in the simulations. The form of *opls* dihedral style is as follows,

$$E(\phi) = \frac{V_1}{2} [1 + \cos(\phi)] + \frac{V_2}{2} [1 - \cos(2\phi)] + \frac{V_3}{2} [1 + \cos(3\phi)] \quad (\text{S6})$$

where  $V_1$ ,  $V_2$  and  $V_3$  are the dihedral coefficients. The detailed dihedral parameters of OPLS-AA potential can be found in **Reference S2.** <sup>2</sup>

### 1.1.2 TIP3P water model

We employ the TIP3P model to simulate the interactions between water molecules. This model is proven to be efficient and can precisely predict the structures and thermodynamic properties of the liquid water phase. It assigns the charges and LJ parameters for each atom of the water molecule. Additionally, the *harmonic* bond and angle style are utilized to describe the O-H bond and the H-O-H angle. More detailed descriptions and parameters can be found in **Reference S3**.<sup>3</sup>

## 1.2 Simulation details

In LAMMPS software, the Nose-Hoover style non-Hamiltonian equations of motion<sup>4, 5</sup> are used to generate positions and velocities of atoms in the simulated system from the NVT or NPT ensembles. The equations of motion used in the simulations are those of Shinoda et al.<sup>6</sup>, which combine the hydrostatic equations of Martyna et al.<sup>7</sup> with the strain energy proposed by Parrinello and Rahman.<sup>8</sup> The time integration schemes closely follow the time-reversible measure-preserving Verlet and rRESPA integrators derived by Tuckerman et al.<sup>9</sup> The  $T_{damp}$  parameter deciding the speed of the relaxation of temperature is equal to 0.2 K, while the  $P_{damp}$  determining the time scale on which pressure is relaxed is a value of 1 ps. It is noteworthy that the reasonable choice for the value of  $P_{damp}$  is about 1000 timesteps. In the case of lower value of  $P_{damp}$ , pressure and volume would fluctuate severely; in the case of higher value of  $P_{damp}$ , the equilibrium for pressure would be time-consuming. In order to reduce the storage requirements for data processing, the coordinates of atoms are output every 50000 timesteps and 500 timesteps, *i.e.* 50 ps and 0.5 ps, in the NPT and NVT ensemble respectively.

Due to the strong electrostatic interactions between ions, we employ the PPPM solver to calculate the long-range Coulombic force. In this method 3d FFTs is used to solve Poisson's equation on the mesh where atom charge is mapped, and then electric fields are interpolated on the mesh points back to the atoms. The PPPM solver is a more excellent method than the Ewald summation in terms of saving the computation time and memory storage, because it scales as  $N \log(N)$  where  $N$  is the total atom numbers while the Ewald summation scales as  $N^{3/2}$ . The accuracy of PPPM method is 0.001 eV/Å and the grid of the mesh is  $18 \times 18 \times 27$  in the simulations. In order to verify the rationality of this mesh, we further compare with different number of grid mesh, as shown in **Figure S1**. As well can see, when the number of grid mesh

equals to  $18 \times 18 \times 27$ , the total, kinetic and potential energy gradually reach a steady. Although the  $E_{\text{coul}}$  is not completely steady, we chose the grid of mesh ( $18 \times 18 \times 27$ ) in the simulations, which may be a little rough, to reduce computing time and improve computational efficiency.

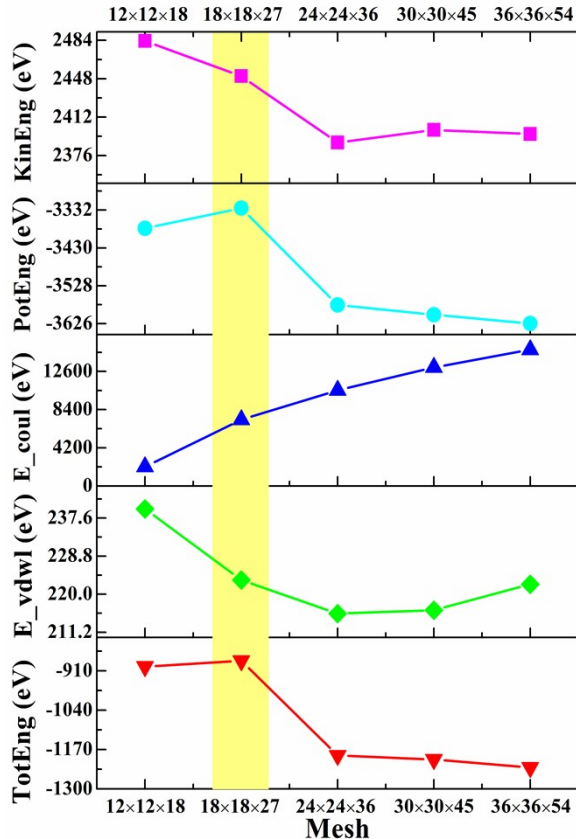

**Figure S1.** Variation of energies with the number of grid mesh increasing

We perform analysis of the simulation results in the NVT ensemble after running the NPT ensemble. In order to control the pressure, the values of box parameter are changed. Thus, we report the values of box parameter of all simulation cases in the NVT ensemble. **Table S3** lists all the box parameters of all simulation conditions in the NVT ensemble. With temperature increasing, the box parameters ( $L_x$ ,  $L_y$  and  $L_z$ ) is slightly larger due to the thermal expansion of the simulation system. Owing to the stronger hydration of divalent cations, the volume of simulation systems with  $\text{Ca}^{2+}$  or  $\text{Mg}^{2+}$  is a bit bigger. **Figure S2** shows that the  $L_x$  or  $L_y$  almost increases linearly with temperature rising for cases with different cations. We fit the curve and obtain the slopes as well as their standard error ( $\text{Ca}^{2+} > \text{Mg}^{2+} > \text{Na}^+$ ), which we attribute to the stronger hydration of divalent cations.



**Table S3.** Box parameters of all cases in the NVT ensemble.

| Cation           | Temperature (K) | Cases    | $L_x$     | $L_y$     | $L_z$     |
|------------------|-----------------|----------|-----------|-----------|-----------|
| Na <sup>+</sup>  | 300             | Case 1_1 | 76.300828 | 76.300828 | 111.09942 |
| Na <sup>+</sup>  | 310             | Case 1_2 | 76.610088 | 76.610088 | 111.54972 |
| Na <sup>+</sup>  | 320             | Case 1_3 | 76.897436 | 76.897436 | 111.96812 |
| Na <sup>+</sup>  | 330             | Case 1_4 | 77.147551 | 77.147551 | 112.33231 |
| Na <sup>+</sup>  | 340             | Case 1_5 | 77.481507 | 77.481507 | 112.81857 |
| Na <sup>+</sup>  | 350             | Case 1_6 | 77.774455 | 77.774455 | 113.24513 |
| Ca <sup>2+</sup> | 300             | Case 2_1 | 76.314243 | 76.314243 | 111.11895 |
| Ca <sup>2+</sup> | 310             | Case 2_2 | 76.608268 | 76.608268 | 111.54707 |
| Ca <sup>2+</sup> | 320             | Case 2_3 | 77.016275 | 77.016275 | 112.14116 |
| Ca <sup>2+</sup> | 330             | Case 2_4 | 77.191929 | 77.191929 | 112.39693 |
| Ca <sup>2+</sup> | 340             | Case 2_5 | 77.641835 | 77.641835 | 113.05202 |
| Ca <sup>2+</sup> | 350             | Case 2_6 | 77.756437 | 77.756437 | 113.21889 |
| Mg <sup>2+</sup> | 300             | Case 3_1 | 76.427902 | 76.427902 | 111.28445 |
| Mg <sup>2+</sup> | 310             | Case 3_2 | 76.788523 | 76.788523 | 111.80954 |
| Mg <sup>2+</sup> | 320             | Case 3_3 | 76.96745  | 76.96745  | 112.07007 |
| Mg <sup>2+</sup> | 330             | Case 3_4 | 77.329913 | 77.329913 | 112.59784 |
| Mg <sup>2+</sup> | 340             | Case 3_5 | 77.5718   | 77.5718   | 112.95005 |
| Mg <sup>2+</sup> | 350             | Case 3_6 | 77.959066 | 77.959066 | 113.51393 |

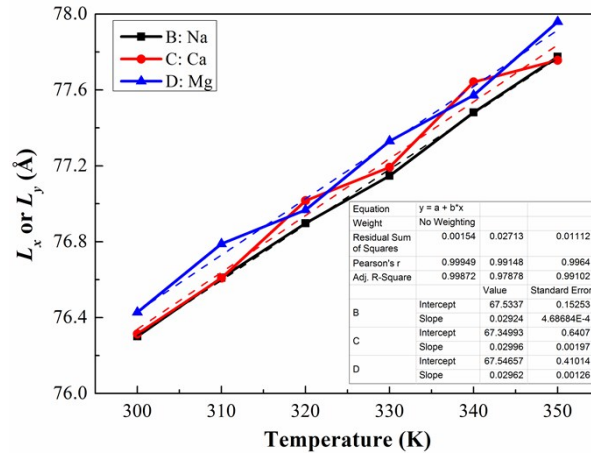**Figure S2.** Variation of box parameters  $L_x$  or  $L_y$  with temperature increasing

In addition, we also analyze the average internal pressure and its relative fluctuations in the NVT simulations. Take Case 1\_6 for example, we obtain the variations of pressure/temperature with simulated time, as shown in **Figure S3**. In the NVT simulations, the volume of simulation box is constant and the

temperature reaches an equilibrium value with slightly fluctuations. However, the fluctuation of pressure is great. Based on the theory of statistical mechanics, the pressure in MD simulations consists of kinetic energy term and virial term. The kinetic energy is almost constant; therefore, the great fluctuation of pressure is dominated by virial term, which is affected by interaction between molecules. Another possible reason for the great fluctuation of pressure is the limited time and space scales, which are decided by molecular relaxation time and free path. Although the fluctuation of pressure is great, time-averaged pressure of our simulation systems (1-2 bar) is a little bigger than desired pressure (1.01325 bar) controlled by the NPT ensemble. We attribute to the not long enough simulation time and enough space.

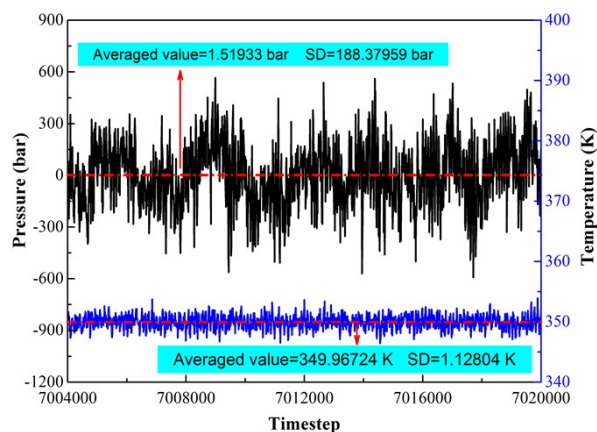

**Figure S3.** Variation of temperature and pressure *versus* timestep

### 1.3 Model validation

In our previous work,<sup>10</sup> we made a detailed validation of our simulation model by comparing the simulated bulk densities or interfacial tension (IFT) with the actual value of them under the same conditions. The results show that our simulation model and methods for decane-water-ions systems are reasonable and feasible. In this paper, silica nanoparticles are added in the decane-water-ions systems. The potential parameters of silica NPs used in our work have been proven to be effective and the simulation results based on them are consistent with experimental results.<sup>11</sup> In addition, we obtain the simulated averaged IFT value during the equilibrium processes (see **Figure S4**) and compare the simulated IFT of decane-water-NPs-ions systems with other results from simulations or experiments.<sup>12-16</sup> Considering that the differences of the conditions (temperature, pressure, ionic concentration and particle size) between the

simulations and the literatures, our results are close to other results, proving the feasibility and efficiency of our model and methods.

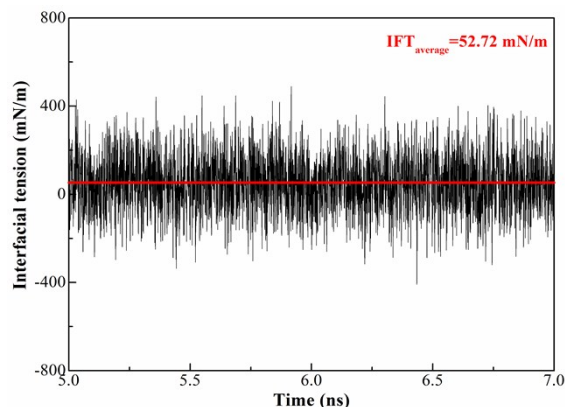

Figure S4. Averaged IFT of Case 1\_1 during the equilibrium process

## 2. Interfacial structure

### 2.1 Interfacial thickness

As stated in the manuscript, we can obtain the interfacial thickness of the decane-water-NPs systems with different cations (300 K, 1 atm), as shown in **Figure S5**. For cases without NPs, the addition of ions causes a slight decrease of the interfacial thickness due to the ionic hydration. After adding NPs, the interfacial thickness enlarges. Meanwhile, the effects of ions on the interfacial thickness are different from those cases without NPs. The order of interfacial thickness is as follows:  $\text{Na}^+ > \text{Ca}^{2+} > \text{Mg}^{2+}$ . We attribute those phenomena to the large size of NPs ( $r = 7.5 \text{ \AA}$ ) and the interaction between NPs/ions.

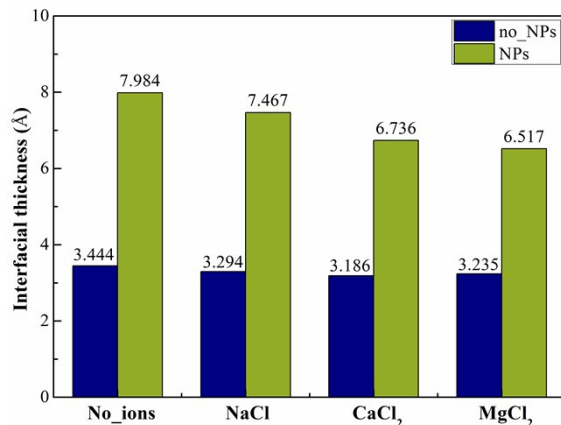

Figure S5. Interfacial thickness vs. ion species under 300 K, 1 atm condition

## 2.2 Density distribution of ions

**Figure S6** shows the number density of cations along  $z$ -direction for cases under 300 K, 1 atm condition. Compared to sodium ions, calcium and magnesium ions have greater number density near the interfacial zone, indicating that calcium and magnesium ions are likely to appear near the interface. Therefore, more water molecules would be attracted by cations and leave the interfacial zone, resulting in a slight decrease of the interfacial thickness, which can be seen from **Figure S5**. Particularly, the fluctuation of curves in **Figure S6** is probably because the ionic hydration hinders the motion of ions or the total simulated time is not long enough. The fluctuation of curves for  $\text{Ca}^{2+}$  or  $\text{Mg}^{2+}$  is severer than that of curve for  $\text{Na}^+$  due to their stronger hydration.

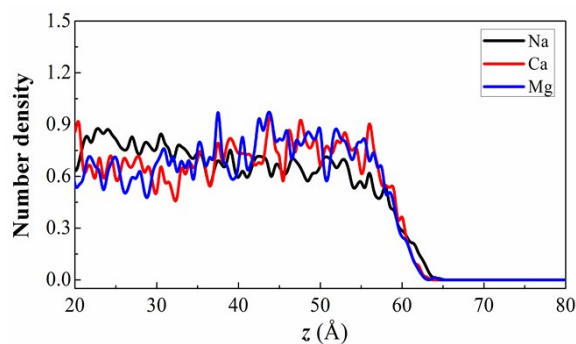

**Figure S6.** Number density distribution of cations along  $z$ -direction for cases under 300 K, 1 atm condition

## 2.3 Hydration number of ions

In order to achieve the density distribution (RDF)  $g(r)$ , it is necessary to obtain the number of atoms at each layer  $\langle \Delta N_{j,n} \rangle$  and the  $n(r)$  function along radial direction, as shown in **Figure S7**. The positions where the  $\langle \Delta N_{j,n} \rangle$  curves reach a peak for  $\text{Mg}^{2+}$  is smaller than those for  $\text{Na}^+$  and  $\text{Ca}^{2+}$ , meaning that the  $\text{Mg}^{2+}$  has smallest radius of hydration. Meanwhile, due to the stronger hydration of divalent cations ( $\text{Ca}^{2+}$  and  $\text{Mg}^{2+}$ ), the second peak of curves is more obvious. The  $n(r)$  function, which is the integral of the  $g(r)$ , increases with the distance  $r$  rising. There are two obviously risen stage when the  $g(r)$  reaches the peaks. Based on these curves, we can further achieve the number of hydration for  $\text{Na}^+$ ,  $\text{Ca}^{2+}$  and  $\text{Mg}^{2+}$ , which approximately equal to 5.2, 7.4 and 6.7 respectively. These results are close to the results in the literatures.<sup>17-22</sup> It also reflects the accuracy of the potential models which we used in the simulations.

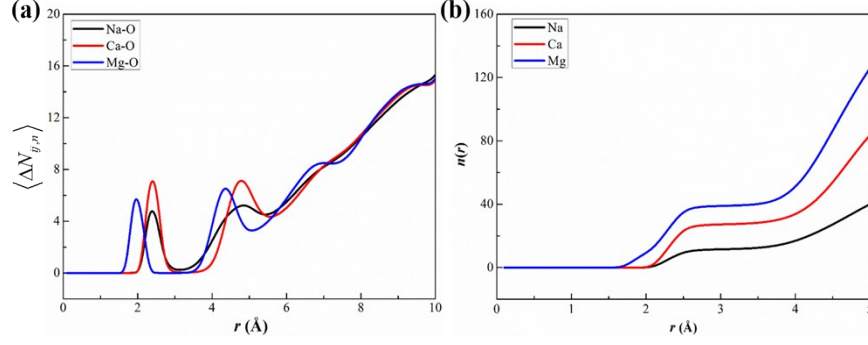

**Figure S7.** Number of atoms at the layer  $\langle \Delta N_{j,n} \rangle$  and the  $n(r)$  function along the radial direction

### 3. Dynamics of nanoparticles

#### 3.1 Calculation of diffusion coefficient

In order to obtain the diffusion coefficients of nanoparticles at the interface, we adopt the Einstein equation, as follows:

$$D = \frac{\langle (x-x_0)^2 + (y-y_0)^2 + (z-z_0)^2 \rangle}{6\Delta t} \quad (S7)$$

where  $x_0$ ,  $y_0$  and  $z_0$  are the initial coordinates at  $t = 0$ ,  $\Delta t$  is the time interval for nanoparticles moving from  $(x_0, y_0, z_0)$  to  $(x, y, z)$ ,  $D$  is diffusion coefficient and numerator means the mean-square-displacement (MSD).

**Figure S8** shows the time-averaged MSD of nanoparticles (Case 1\_1) within 5 ns simulation time. Because of few nanoparticles (two) in our simulations, the fluctuation of MSD curves is severe. We only fit the slope of yellow-part line and acquire the interfacial diffusion coefficient.

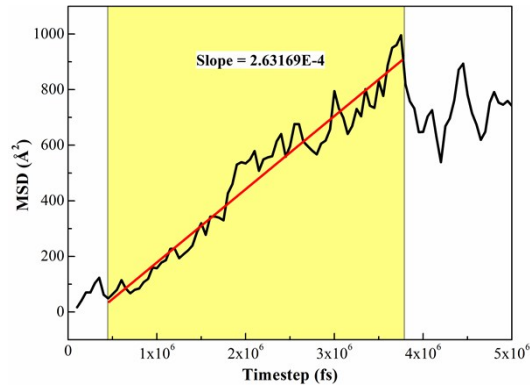

**Figure S8.** MSD of nanoparticles *versus* time

## References

1. G. Kaminski, E. M. Duffy, T. Matsui and W. L. Jorgensen, *J. Phys. Chem.*, 1994, **98**, 13077-13082.
2. S. W. I. Siu, K. Pluhackova and R. A. Böckmann, *J. Chem. Theory Comput.*, 2012, **8**, 1459-1470.
3. W. L. Jorgensen, J. Chandrasekhar, J. D. Madura, R. W. Impey and M. L. Klein, *J. Chem. Phys.*, 1983, **79**, 926-935.
4. S. Nosé, *Mol. Phys.*, 1984, **52**, 255-268.
5. W. G. Hoover, *Phys. Rev. A Gen. Phys.*, 1985, **31**, 1695-1697.
6. W. Shinoda, M. Shiga and M. Mikami, *Phys. Rev. B*, 2004, **69**, 134103.
7. G. J. Martyna, D. J. Tobias and M. L. Klein, *J. Chem. Phys.*, 1994, **101**, 4177-4189.
8. M. Parrinello and A. Rahman, *Phys. Rev. Lett.*, 1980, **45**, 1196-1199.
9. M. E. Tuckerman, J. Alejandre, R. López-Rendón, A. L. Jochim and G. J. Martyna, *J. Phys. A Gen. Phys.*, 2006, **39**, 5629.
10. B. Wen, C. Sun, B. Bai, E. Y. Gatapova and O. A. Kabov, *Phys. Chem. Chem. Phys.*, 2017, **19**, 14606-14614.
11. F. S. Emami, V. Puddu, R. J. Berry, V. Varshney, S. V. Patwardhan, C. C. Perry and H. Heinz, *Chem. Mater.*, 2014, **26**, 2647-2658.
12. C. O. Metin, J. R. Baran, Jr. and Q. P. Nguyen, *J. Nanopar. Res.*, 2012, **14**, 1246.
13. S. Ferdous, M. A. Ioannidis and D. E. Henneke, *J. Nanopar. Res.*, 2012, **14**, 850.
14. L. S. de Lara, M. F. Michelon, C. O. Metin, Q. P. Nguyen and C. R. Miranda, *J. Chem. Phys.*, 2012, **136**, 164702.
15. M. A. Fernandez-Rodriguez, J. Ramos, L. Isa, M. A. Rodriguez-Valverde, M. A. Cabrerizo-Vilchez and R. Hidalgo-Alvarez, *Langmuir*, 2015, **31**, 8818-8823.
16. H. Fan, D. E. Resasco and A. Striolo, *Langmuir*, 2011, **27**, 5264-5274.
17. S. B. Rempe and L. R. Pratt, *Fluid Phase Equil.*, 2001, **183**, 121-132.
18. I. Bakó, J. Hutter and G. Pálinkás, *J. Chem. Phys.*, 2002, **117**, 9838-9843.
19. A. L. V. Geet, *J. Am. Chem. Soc.*, 1972, 5583-5587.
20. RiahiSaleh, RouxBenoît and N. Rowleychristopher, *Can. J. Chem.*, 2013, **91**, 552-558.
21. J. Mähler and I. Persson, *Inorg. Chem.*, 2012, **51**, 425-438.
22. G. Bai, H.-B. Yi, H.-J. Li and J.-J. Xu, *Mol. Phys.*, 2013, **111**, 553-568.
